# Supplementary material
Source: publisher site journal article supplement (https://vcs.pensoft.net/article/95750/download/suppl/32/)

**Supplementary Material 2.** Temporal distribution of the vegetation plots contained in VegAndes (5,340 plots) based on their source (publication year or dataset description). Plot numbers are expressed as independent values (gray) as well as cumulative values (orange) per decade.

*Peyre G, Montesinos D, Giraldo D, Galán de Mera A, Ruthsatz B, Luebert F, Ontivero M, García N, Álvarez M, Meneses RI, Lozano P, León D, Weigend M, Anthelme F, Palma M, Rodríguez C. 2022. VegAndes: the vegetation database for the Latin American highlands*

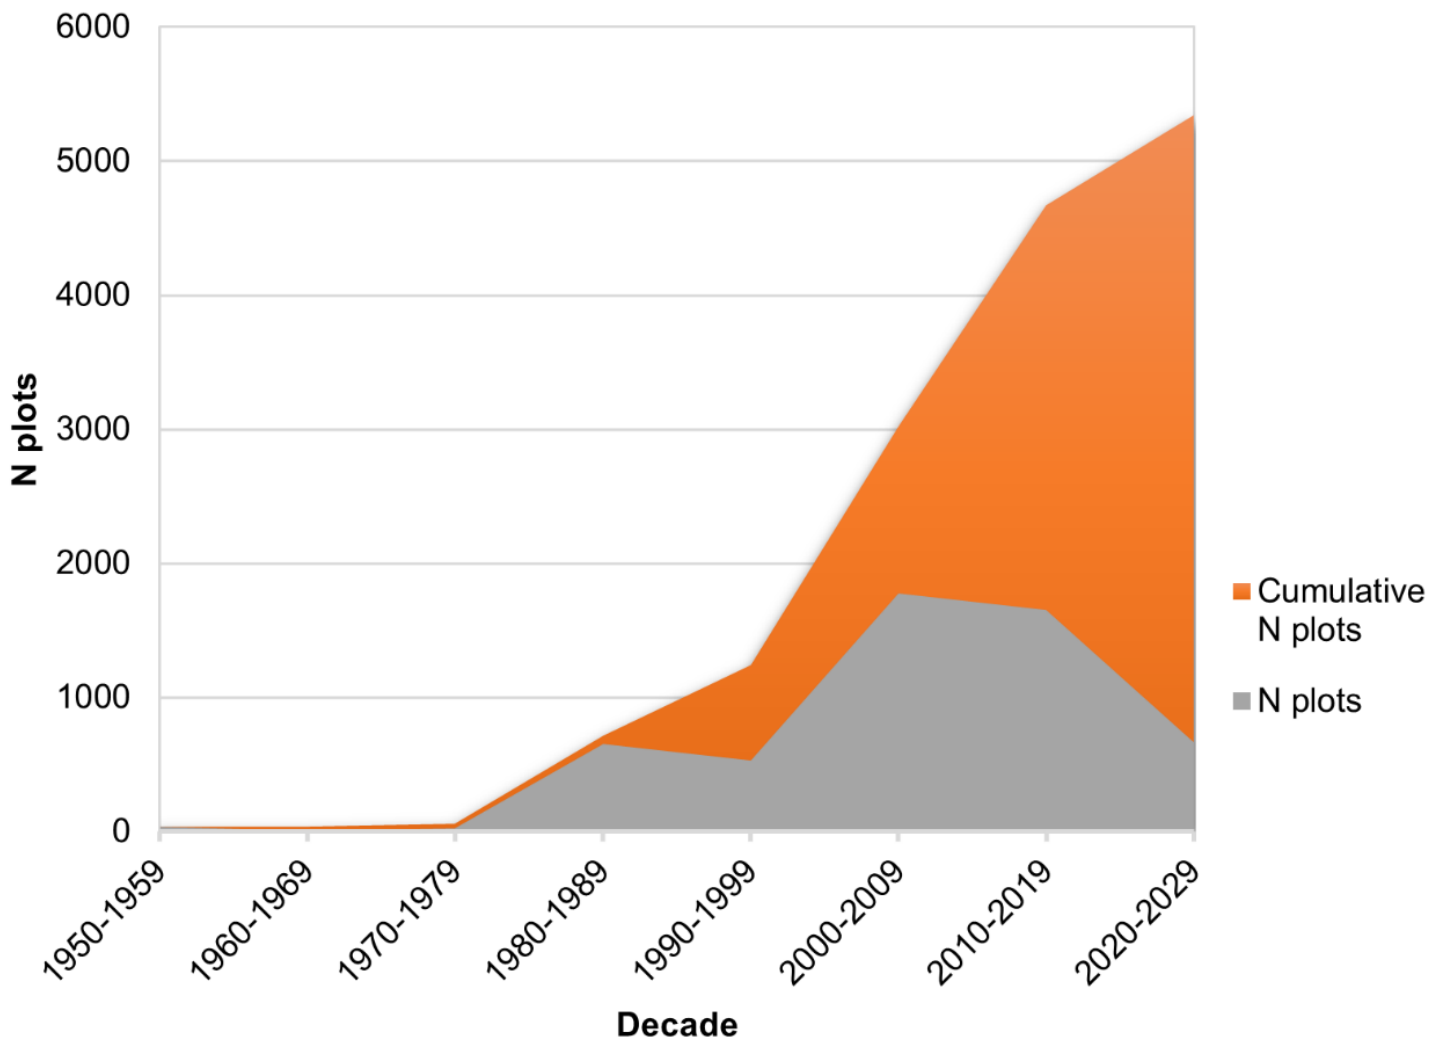

Supplement: Supplementary file 1
